# Supplementary material
Source: PubMed Central journal article supplement (PMC10387483)
Supplement: 41423_2023_1049_MOESM1_ESM.pdf [file 41423_2023_1049_MOESM1_ESM.pdf]

**B1 cells produce anti-phosphatidylserine antibodies via TLR-mediated Syk  
activation and contribute to lupus nephritis development**

Supplementary Table and Figures

**Supplementary Table 1. Patient and healthy control characteristics**

|                                | HC (n=18)  | SLE                        |                             | Statistics      |
|--------------------------------|------------|----------------------------|-----------------------------|-----------------|
|                                |            | PS-specific IgG Low (n=29) | PS-specific IgG High (n=35) |                 |
| <b>Cohort demographics</b>     |            |                            |                             |                 |
| Female (%)                     | 17/18      | 29/29                      | 34/35                       | -               |
| Mean age (years)               | 30.7 ± 6.7 | 31.0 ± 13.8                | 38.6 ± 13.9                 | p = 0.0224 *    |
| <b>Patient characteristics</b> |            |                            |                             |                 |
| SLEDAI                         | /          | 5.4 ± 3.0                  | 8.5 ± 6.8                   | p = 0.0351 *    |
| Nephritis                      | /          | 7/22                       | 15/20                       |                 |
| Disease duration (years)       | /          | 3.8 ± 3.3                  | 7.6 ± 7.3                   | .p = 0.0462 *   |
| <b>Laboratory parameters</b>   |            |                            |                             |                 |
| Anti-dsDNA (IU/mL)             | /          | 119.9 ± 142.7              | 711.7 ± 865.3               | p < 0.0001 **** |
| C3 (d/L)                       | /          | 0.68 ± 0.27                | 0.63 ± 0.28                 | n.s             |
| C4 (d/L)                       | /          | 0.14 ± 0.09                | 0.37 ± 1.5                  | n.s             |
| WBC (10 <sup>9</sup> /L)       | /          | 6.3 ± 3.2                  | 6.3 ± 2.6                   | n.s             |
| PLT (10 <sup>9</sup> /L)       | /          | 172.3 ± 69.2               | 221.5 ± 124.9               | n.s             |
| RBC (10 <sup>12</sup> /L)      | /          | 3.7 ± 0.8                  | 3.8 ± 0.8                   | n.s.            |

Data are presented as mean ± SEM according to data distribution. Groups were compared with \*Mann-Whitney U test (between two groups). HC, healthy controls; SLE, Systemic Lupus Erythematosus; Anti-PS IgG Low (Absorbance<sub>OD450nm</sub> < 1 ); Anti-PS IgG positive (Absorbance<sub>OD450nm</sub> > 1 ); SLEDAI, Systemic Lupus Erythematosus Disease Activity Index; C, complement factor; WBC, white blood cell; PLT, platelet; RBC, red blood cell.

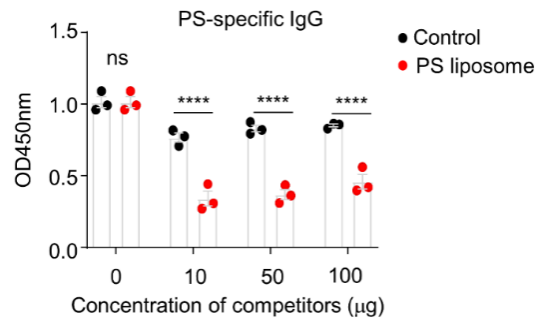

**Supplementary Fig. 1 SLE PS-specific IgG effectively binding to the PS liposome with high affinity.** Data plot shows the serum PS-specific IgG levels with active SLE serum (SLEDAI > 5, n = 3) by the competitive ELISA assay with preincubation PS antigen (PS liposome) or control antigen (PC liposome) for 1 h. Nonparametric Mann–Whitney *U* test, \*\*\*\*,  $P < 0.0001$ .

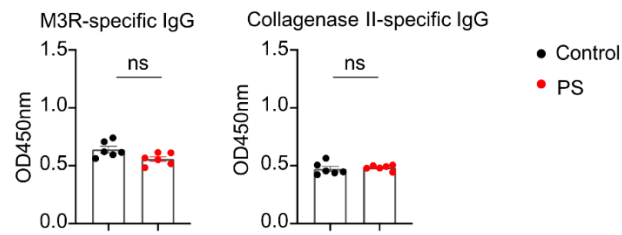

**Supplementary Fig. 2 Comparable levels of M3R- or collagenase II- specific IgG in mice with PS liposome immunization.** Representative data plots show M3R-specific IgG ( $\alpha$ M3R IgG) and collagenase II -specific IgG ( $\alpha$ collagenase II IgG) in serum samples (1:200 dilution) of control or PS immunized mice for 12 weeks (n = 6 per group). Unpaired two-tailed Student's t-test, ns, no significance.

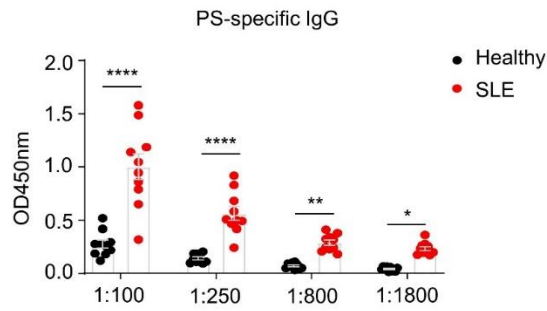

**Supplementary Fig. 3 Elevated levels of serum PS-specific IgG in SLE patients.**

Data plot shows the serum PS-specific IgG levels using gradient diluted serum samples (1:100, 1:250, 1:800 and 1:1800) from active SLE patients (SLEDAI > 5, n =10) and healthy donors (n = 10). Nonparametric Mann–Whitney *U* test, \*,  $P < 0.05$ ; \*\*,  $P < 0.01$ ; \*\*\*\*,  $P < 0.0001$ .

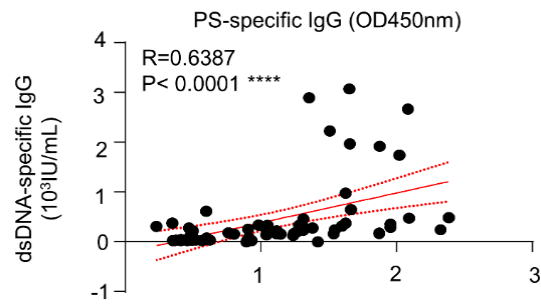

**Supplementary Fig. 4 Positive correlation between serum levels of PS-specific IgG and dsDNA-specific IgG in SLE patients.** Data plot shows the correlation between serum PS-specific IgG levels and dsDNA-specific IgG in SLE patients (n = 64). Spearman's rank coefficient of correlation, \*\*\*\*, P <0.0001.

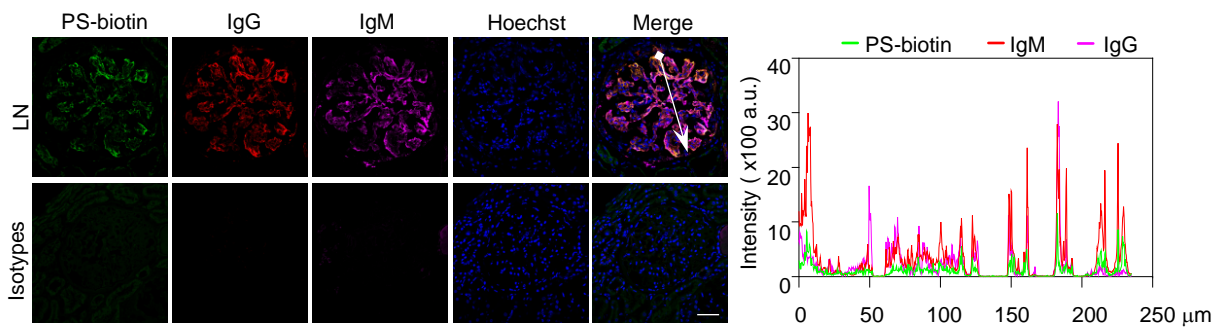

**Supplementary Fig. 5 Renal deposition of PS-reactive autoantibodies in patients with LN.** Representative confocal images show the colocalization of PS-biotin (detected with Alex fluo 488-streptavidin), IgG and IgM in kidney biopsies of lupus nephritis patients (scale bar, 50μm).

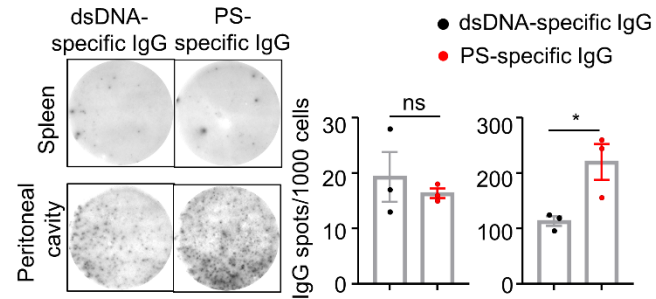

**Supplementary Fig. 6 Peritoneal B cells are the major source of PS-specific IgG in lupus mice.** Representative ELISPOT detections and data plots show the PS-specific and dsDNA-specific IgG spots in splenic and peritoneal B cells from lupus mice (n = 3). Unpaired two-tailed Student's t-test, ns, no significance; \*, P < 0.05.



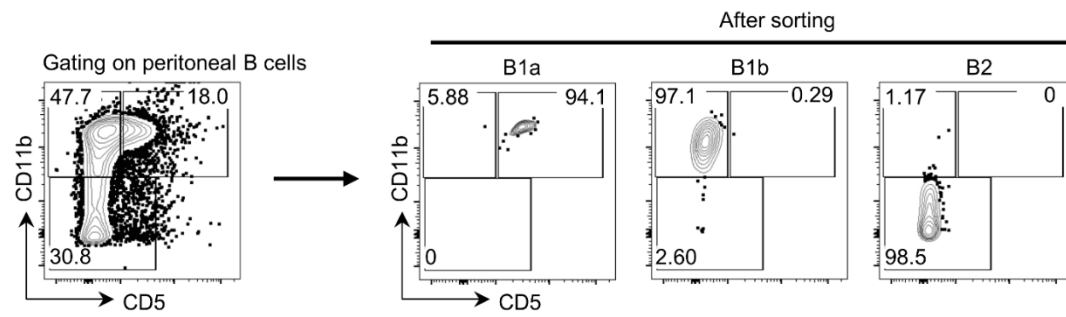

**Supplementary Fig. 7 Sorting purity of B cell subsets.** Representative flow cytometric images show the frequencies of peritoneal B1a, B1b, and B2 cells before and after cell sorting.

10 - week age MRL/Lpr mice

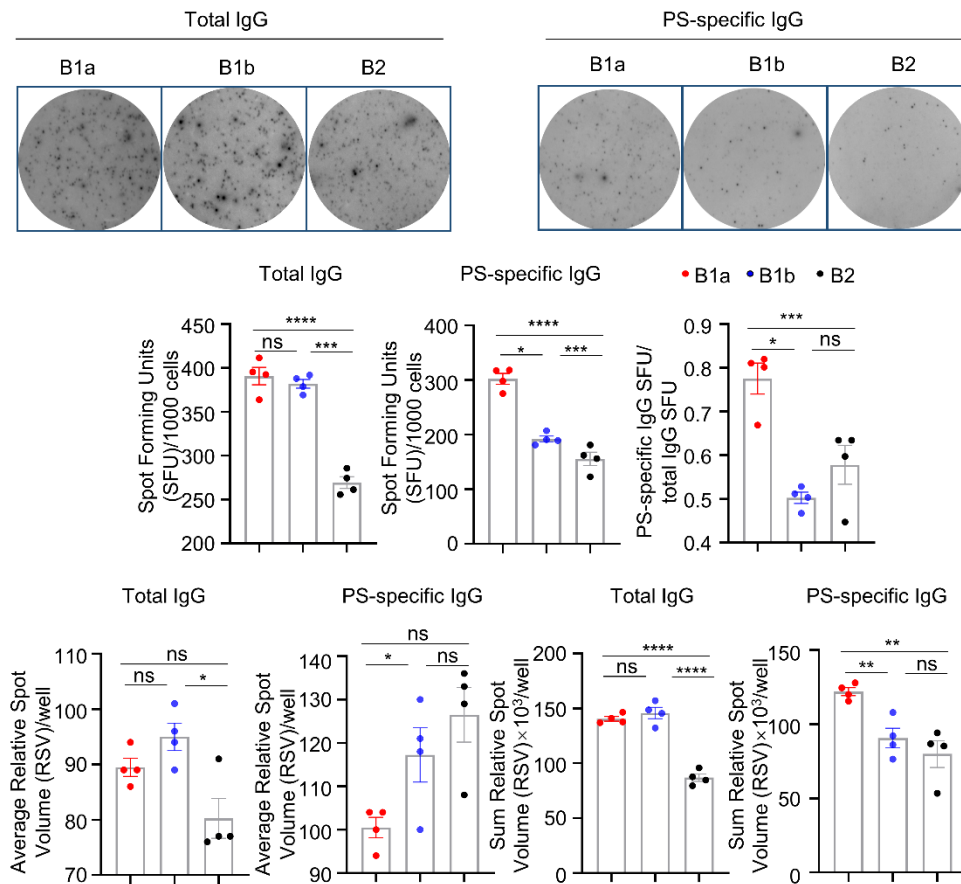

**Supplementary Fig. 8 ELISPOT analysis of peritoneal B cell subsets in MRL/Lpr mice.** B1a, B1b and B2 cells were sorted and purified from peritoneal cavity of MRL/Lpr mice at 10 weeks of age. Total IgG and PS-specific IgG-secreting cells were detected by ELISPOT assay. The Spot Forming Units (SFU) of total IgG and PS-specific IgG spot, total IgG/PS-specific IgG spot SFU ratio, average and sum Relative Spot Volume (RSV) of by total IgG and PS-specific IgG spots an IRIS reader. n = 4 per group. Unpaired t-test; ns, no significance; \*, p < 0.05; \*\*, p < 0.01; \*\*\*, p < 0.001; \*\*\*\*, p < 0.0001.

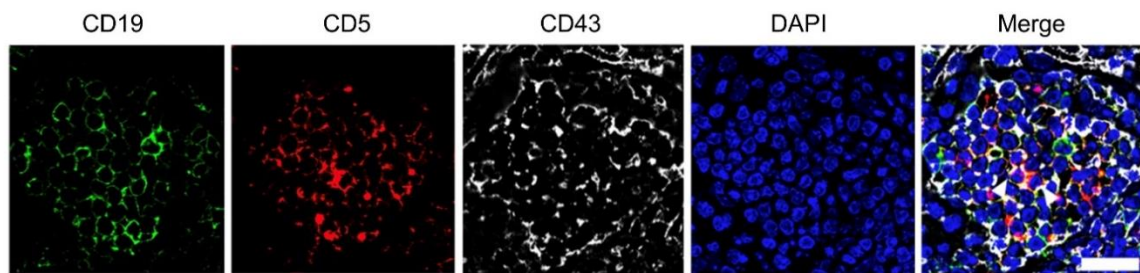

**Supplementary Fig. 9 Renal infiltration of B1 cells in lupus mice.** Representative confocal image shows CD43(white), CD5(red), and CD19 (green) triple-positive B1a cells in kidney sections of 24-week-old MRL/Lpr mice (scale bar, 20 $\mu$ m).

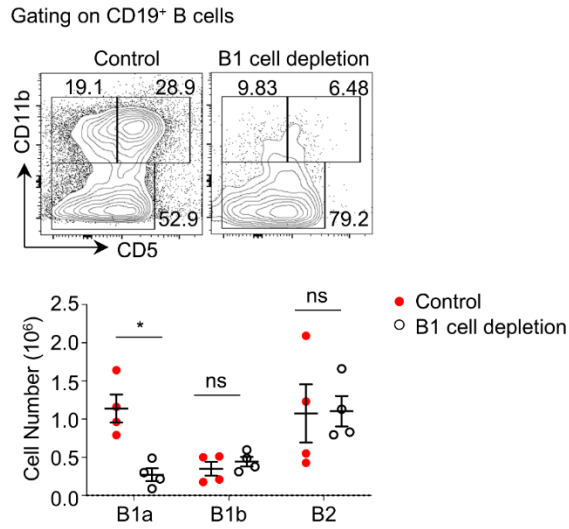

**Supplementary Fig. 10 Efficacy of B1a depletion in MRL/Lpr mice.** Representative flow cytometric profiles and data plot show B1a cells, B1b cells and B2 cells in peritoneal cavity of MRL/Lpr mice with control PBS or hypo-osmotic water treatment for successive 20 weeks (n = 4 per group). Unpaired two-tailed Student's t-test, \*\*\*, P < 0.001.

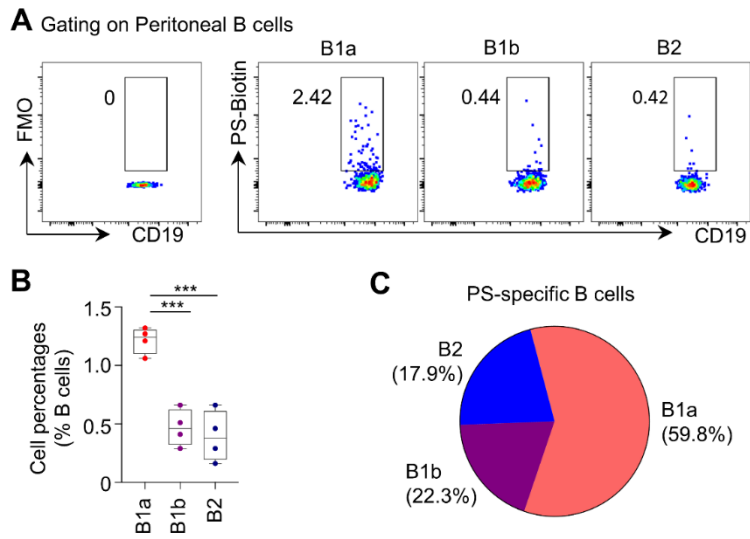

**Supplementary Fig.11 B1a cells are the major compartment of PS-specific B subsets in lupus-prone MRL/Lpr mice. (A-C)** Representative flow cytometric profiles (A), the data plot (B) and pie chart (C) show PS-specific B subsets within B1a cells, B1b cells and B2 cells in peritoneal cavity of MRL/Lpr mice at 24-week age (n = 3). One-way ANOVA, \*\*\*, P < 0.001.
